# Supplementary material
Source: Royal Society of Chemistry journal article supplement (doi:10.1039/d6an00409a)
Supplement: d6an00409a1.pdf [file d6an00409a1.pdf]

## Supplementary Information

### A novel electrochemiluminescence sensor using Lu-Au@Ni-MOF for ultra-sensitive detection of permethrin

Yahui Ji, Nana You, Xiaoping Hu, Fangxin Du, Hui Gao, Jie Ru\*, Gen Liu\*

Key Laboratory of Green and Precise Synthetic Chemistry and Applications, Ministry of Education; Anhui Provincial Key Laboratory of Synthetic Chemistry and Applications; School of Chemistry and Chemical Engineering, Huaibei Normal University, Huaibei, Anhui 235000, P R China

\* E-mail addresses: rujie@chnu.edu.cn (J. Ru); liugen7084@126.com (G. Liu)

#### S1. Reagents

Chloroauric acid ( $\text{HAuCl}_4$ ), hydrochloric acid ( $\text{HCl}$ ), nickel nitrate hexahydrate ( $\text{Ni}(\text{NO}_3)_2 \cdot 6\text{H}_2\text{O}$ ), *N,N*-dimethylformamide (DMF), ethanol, and terephthalic acid ( $\text{H}_2\text{BDC}$ ) were obtained from Sinopharm Chemical Reagent Co., Ltd. (China). Luminol and Nafion were purchased from Sigma-Aldrich (USA). Phosphate buffer solutions (PBS,  $0.1 \text{ mol} \cdot \text{L}^{-1}$ ) were prepared by mixing appropriate volumes of  $\text{Na}_2\text{HPO}_4 \cdot 12\text{H}_2\text{O}$  and  $\text{NaH}_2\text{PO}_4 \cdot 2\text{H}_2\text{O}$  stock solutions, with the pH adjusted using  $0.1 \text{ mol} \cdot \text{L}^{-1}$   $\text{H}_3\text{PO}_4$  or  $\text{NaOH}$ . All chemicals were of analytical grade and used as received. Ultrapure water was used throughout the experiments.

#### S2. Instruments

ECL measurements were performed on an ECL-9B analyzer (State Key Laboratory of Analytical Chemistry for Life Science, Nanjing University, China) equipped with a photomultiplier tube. All ECL experiments were carried out in a conventional three-electrode system: a Lu-Au@Ni-MOF modified glassy carbon electrode (GCE, 3 mm diameter) as the working electrode, an Ag/AgCl (saturated KCl) electrode as the reference electrode, and a platinum wire as the counter electrode.

The morphology and microstructure of the materials were characterized by scanning electron

29 microscopy (SEM, Regulus8220, Japan) and transmission electron microscopy (TEM, Jem2100UHR,  
30 Japan). X-ray diffraction (XRD) patterns were collected on a Bruker D8 Advance diffractometer  
31 (Germany) using Cu K $\alpha$  radiation. Fourier-transform infrared (FT-IR) spectra were recorded on a  
32 Nicolet iS50 spectrometer (Thermo Scientific, USA). X-ray photoelectron spectroscopy (XPS)  
33 analysis was conducted on a Thermo Scientific Escalab 250Xi system (USA) with a monochromatic  
34 Mg K $\alpha$  X-ray source. The specific surface area and pore size distribution of the material were  
35 determined by N<sub>2</sub> adsorption-desorption measurements at 77.3 K using a Micromeritics ASAP 2020  
36 analyzer (USA), with data analyzed via the Brunauer-Emmett-Teller (BET) method and the Barrett-  
37 Joyner-Halenda (BJH) model, respectively.

38

### 39 **S3. Preparation of ECL probes**

40 **Ni-MOF:** The Ni-MOF was synthesized via a modified solvothermal method based on a reported  
41 procedure [1]. Briefly, Solution A was prepared by dissolving 2.3263 g of Ni(NO<sub>3</sub>)<sub>2</sub>·6H<sub>2</sub>O in 30 mL  
42 of DMF under magnetic stirring for 30 min. Separately, Solution B was obtained by dissolving  
43 0.6645 g of H<sub>2</sub>BDC in 30 mL of DMF with stirring for 30 min. Solution B was then poured into  
44 Solution A, and the mixture was stirred for another 30 min while 500  $\mu$ L of HCl was slowly added  
45 dropwise, yielding a homogeneous green solution. The mixture was transferred into a Teflon-lined  
46 stainless-steel autoclave and heated at 180 °C for 24 h. After cooling to room temperature, the  
47 product was collected by centrifugation at 8000 rpm, washed sequentially with DMF and anhydrous  
48 ethanol five times each, and finally dried under vacuum at 60 °C to obtain the Ni-MOF solid.

49

50 **Lu-Au@Ni-MOF:** The Lu-Au@Ni-MOF composite was synthesized according to a previously  
51 reported procedure with minor modifications [2]. In a typical process, 40 mg of the as-prepared Ni-  
52 MOF was dispersed in 1 mL of 10 mmol·L<sup>-1</sup> HAuCl<sub>4</sub> solution and stirred for 4 h. Subsequently, 2  
53 mL of 1 mmol·L<sup>-1</sup> luminol solution was added, and the mixture was stirred for another 2 h. The  
54 resulting product was collected by centrifugation at 2000 rpm for 5 min, washed thoroughly, and  
55 finally dried under vacuum at 60 °C to obtain Lu-Au@Ni-MOF.

57 **S4. ECL signal of GCE/Lu-Au@Ni-MOF**

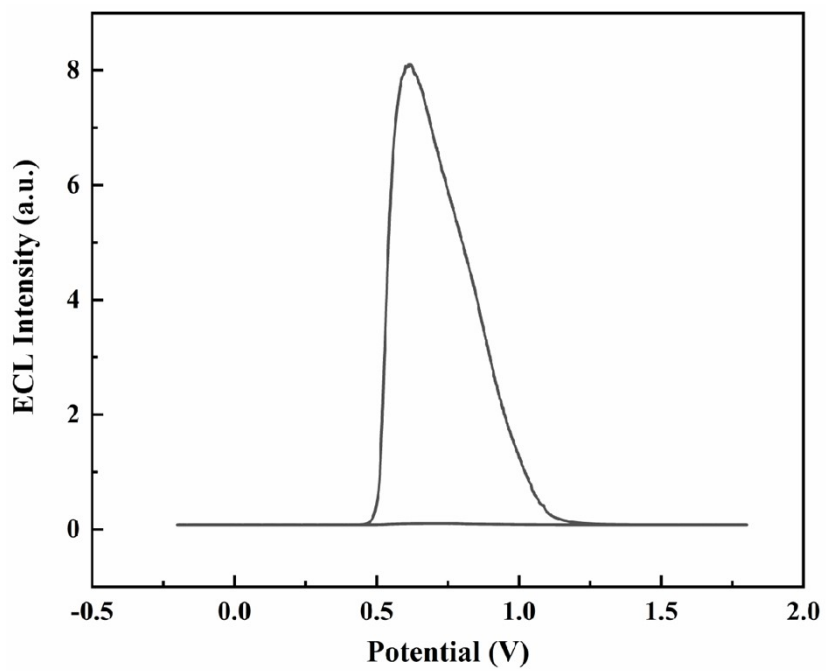

58

59

**Fig. S1 ECL-potential curve of GCE/Lu-Au@Ni-MOF.**

61 S5. EDX spectra and relative element content of Lu-Au@Ni-MOF

62

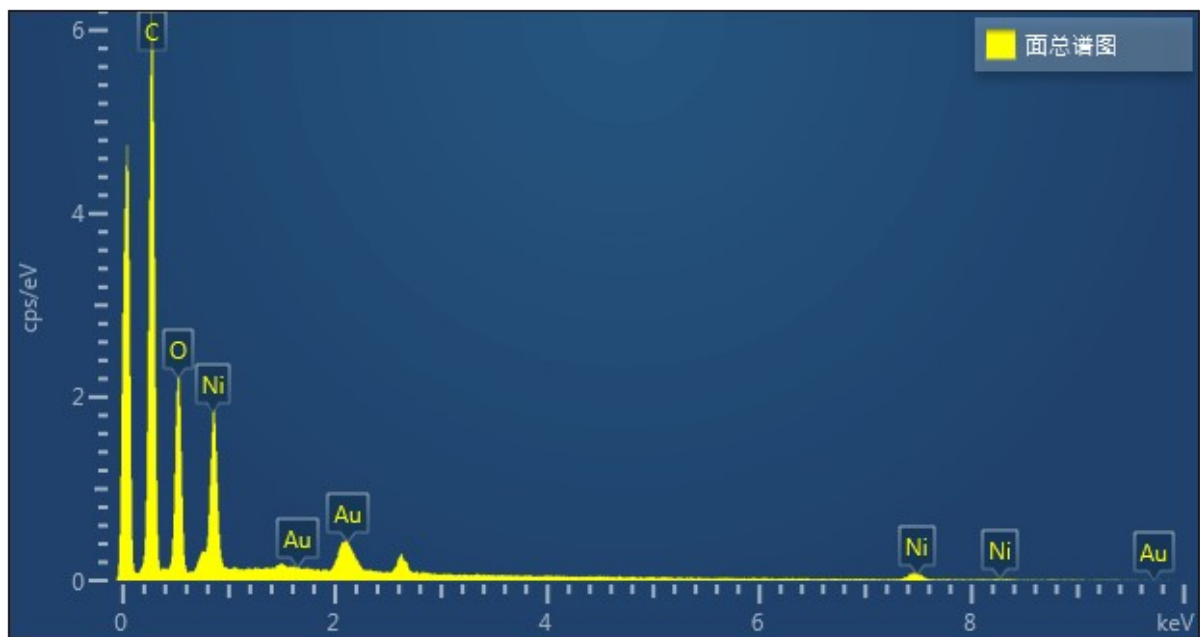

63

64 Fig. S2 EDX spectra of Lu-Au@Ni-MOF.

65

66 Table S1 SEM-EDX quantification results of Lu-Au@Ni-MOF.

| Elements | Apparent concentration | k ratio | wt / % | wt / % Sigma |
|----------|------------------------|---------|--------|--------------|
| C K      | 69.72                  | 0.69721 | 49.80  | 0.92         |
| O K      | 61.69                  | 0.20760 | 18.29  | 0.39         |
| Ni K     | 62.31                  | 0.62312 | 29.30  | 1.24         |
| Au M     | 4.6                    | 0.04597 | 2.61   | 0.37         |
| Total    |                        |         | 100.00 |              |

67

69 S6. BET and BJH analysis

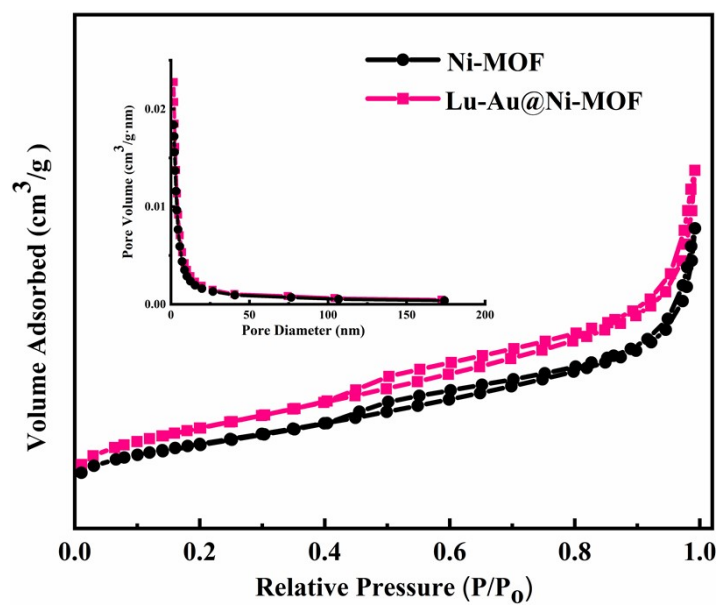

70

71 Fig. S3 N<sub>2</sub> adsorption-desorption isotherms and pore size distributions of Ni-MOF and Lu-Au@Ni-MOF.

72

73 Table S2 The surface area, pore volume and pore size of Ni-MOF and Lu-Au@Ni-MOF.

| Samples      | Surface area (m <sup>2</sup> ·g <sup>-1</sup> ) | Pore volume (m <sup>3</sup> ·g <sup>-1</sup> ) | Pore size (nm) |
|--------------|-------------------------------------------------|------------------------------------------------|----------------|
| Ni-MOF       | 138.13                                          | 0.29                                           | 5.61           |
| Lu-Au@Ni-MOF | 204.10                                          | 0.37                                           | 4.86           |

74

76 S7. ECL response of different electrodes

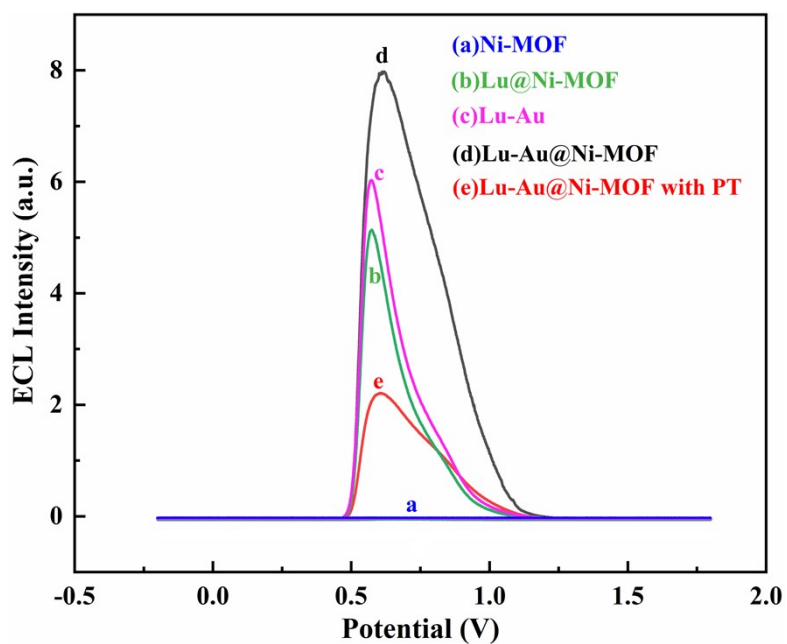

77

78 Fig. S4 ECL behavior of GCE/Ni-MOF (a), GCE/Lu@Ni-MOF (b), GCE/Lu-Au (c), GCE/Lu-Au@Ni-MOF

79

(d), and GCE/Lu-Au@Ni-MOF with PT (e).

80

## 82 S8. Optimization of experimental conditions

83 The concentration of the co-reactant  $\text{H}_2\text{O}_2$  is of paramount importance for the ECL efficiency.  
84 As depicted in Fig. S5, its concentration was optimized under fixed conditions ( $1.00 \times 10^{-5} \text{ mol}\cdot\text{L}^{-1}$   
85 PT, pH 7.0, scan rate of  $100 \text{ mV}\cdot\text{s}^{-1}$ ). The ECL intensity increased with  $\text{H}_2\text{O}_2$  concentration from 30  
86 to  $100 \text{ mmol}\cdot\text{L}^{-1}$  and then plateaued. Consequently,  $100 \text{ mmol}\cdot\text{L}^{-1}$  was chosen as the optimal  
87 concentration for subsequent experiments.

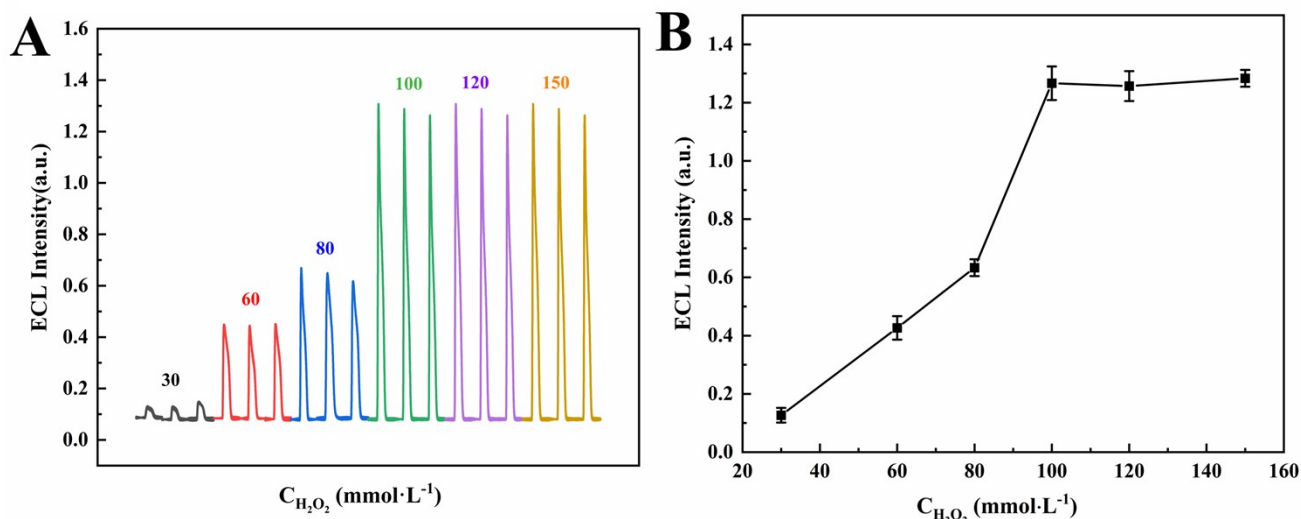

88  
89 **Fig. S5 (A) ECL curves of the sensor at varying  $\text{H}_2\text{O}_2$  concentrations in the range of 30 to 150  $\text{mmol}\cdot\text{L}^{-1}$ ; (B)**  
90 **The corresponding ECL intensity profiles at different  $\text{H}_2\text{O}_2$  concentrations. The error bars represent five**  
91 **independent measurements.**

93 The influence of pH on the ECL response was evaluated from 6.0 to 9.0 under fixed analytical  
94 conditions ( $1.00 \times 10^{-5} \text{ mol}\cdot\text{L}^{-1}$  PT, scan rate of  $100 \text{ mV}\cdot\text{s}^{-1}$ ). The signal reached a maximum at pH  
95 7.5, as illustrated in Fig. S6, and decreased on either side of this value. Accordingly, pH 7.5 was  
96 adopted for all further measurements.

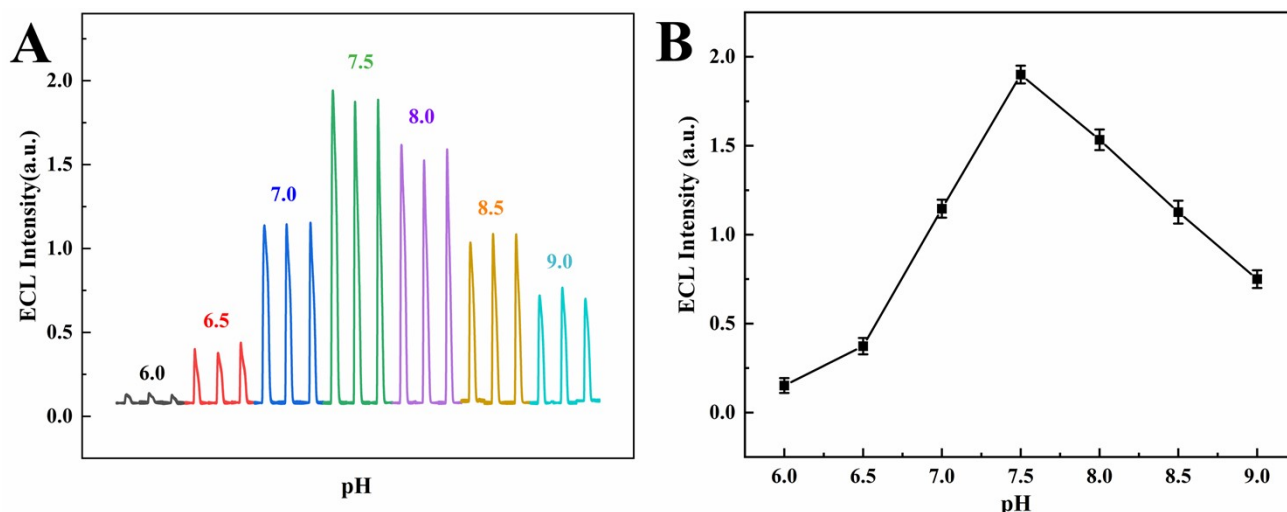

97  
 98 **Fig. S6 (A) ECL curves of the sensor at pH 6.0 to 9.0 (pH=6.0, 6.5, 7.0, 7.5, 8.0, 8.5, 9.0); (B) the ECL**  
 99 **changing trend diagram toward pH. The error bars represent five independent measurements.**

100

101 The scan rate was optimized between 30 and 220  $\text{mV}\cdot\text{s}^{-1}$ . Excessively high rates lead to signal  
 102 suppression due to mass transport limitations, while overly slow rates increase measurement time  
 103 and potential interference. As shown in Fig. S7, the ECL intensity increased up to 130  $\text{mV}\cdot\text{s}^{-1}$  and  
 104 then decreased, establishing 130  $\text{mV}\cdot\text{s}^{-1}$  as the optimum.

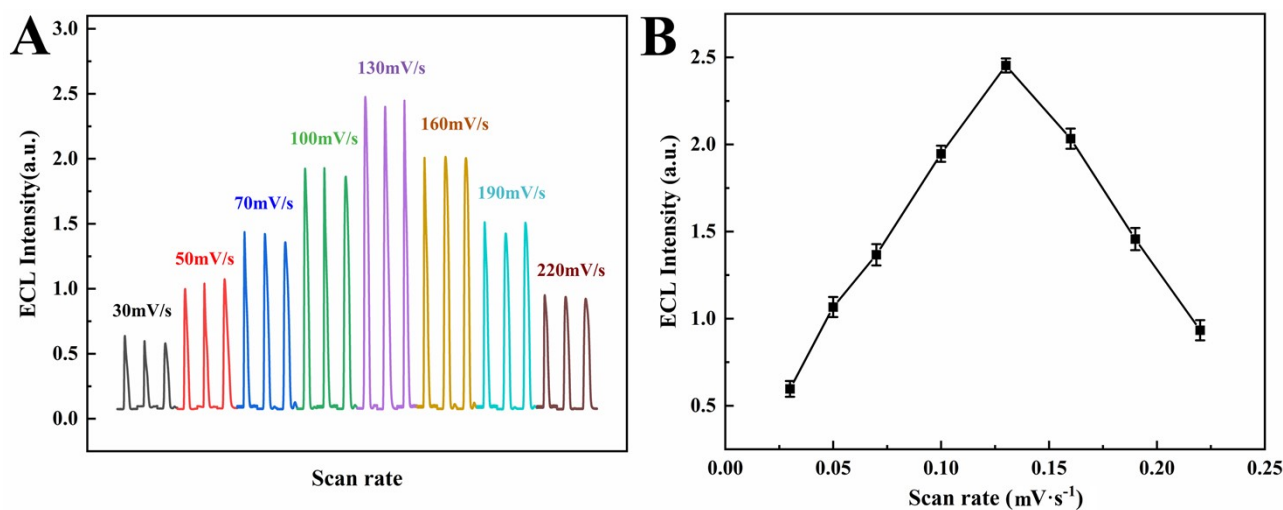

105

106 **Fig. S7 (A) ECL curves of the sensor at scan rates of 30 to 220  $\text{mV}\cdot\text{s}^{-1}$ ; (B) the ECL changing trend diagram**  
 107 **toward scan rates. The error bars represent five independent measurements.**

109 **S9. Comparison of different methods**110 **Table S3 Comparison of the analytical performances of reported methods.**

| Methods | Linear range (mol·L <sup>-1</sup> )            | LOD (mol·L <sup>-1</sup> ) | Ref.      |
|---------|------------------------------------------------|----------------------------|-----------|
| ECL     | $2.60 \times 10^{-9} \sim 4.30 \times 10^{-5}$ | $8.70 \times 10^{-10}$     | 3         |
| HPLC    | $6.39 \times 10^{-8} \sim 5.11 \times 10^{-5}$ | $5.11 \times 10^{-8}$      | 4         |
| HPLC-UV | $1.28 \times 10^{-9} \sim 2.56 \times 10^{-6}$ | $5.12 \times 10^{-10}$     | 5         |
| SERS    | $2.56 \times 10^{-7} \sim 5.12 \times 10^{-5}$ | $8.96 \times 10^{-9}$      | 6         |
| ECL     | $5.00 \times 10^{-9} \sim 5.00 \times 10^{-5}$ | $1.80 \times 10^{-10}$     | This work |

111

113 **S10. PT degradation monitoring in soil**

114 **Table S4 Daily monitoring of soil PT concentration for 8 consecutive days**

| Day                  | Obtained (nmol·L <sup>-1</sup> ) | Average | SD     | RSD (%) |
|----------------------|----------------------------------|---------|--------|---------|
| day 1<br>(reference) | 81.32                            | 76.86   | 3.922  | 5.1%    |
|                      | 73.94                            |         |        |         |
|                      | 75.33                            |         |        |         |
| day 2                | 73.94                            | 74.40   | 0.8025 | 1.1%    |
|                      | 75.33                            |         |        |         |
|                      | 73.94                            |         |        |         |
| day 3                | 69.82                            | 71.68   | 2.089  | 2.9%    |
|                      | 71.28                            |         |        |         |
|                      | 73.94                            |         |        |         |
| day 4                | 65.92                            | 68.10   | 1.989  | 2.9%    |
|                      | 69.82                            |         |        |         |
|                      | 68.55                            |         |        |         |
| day 5                | 61.10                            | 58.20   | 2.511  | 4.3%    |
|                      | 56.75                            |         |        |         |
|                      | 56.75                            |         |        |         |
| day 6                | 55.59                            | 56.98   | 1.211  | 21%     |
|                      | 57.81                            |         |        |         |
|                      | 57.54                            |         |        |         |
| day 7                | 50.58                            | 49.06   | 2.633  | 5.3%    |
|                      | 46.02                            |         |        |         |
|                      | 50.58                            |         |        |         |
| day 8                | 19.58                            | 20.63   | 1.004  | 4.9%    |
|                      | 20.73                            |         |        |         |
|                      | 21.58                            |         |        |         |

## 116 **References**

- 117 1. W. Huang, Y. Chen, L. Wu, M. Long, Z. Lin, Q. Su, F. Zheng, S. Wu, H. Li and G. Yu, *Talanta*,  
118 2022, 247, 123596.
- 119 2. S. Wang, M. Wang, C. Li, H. Li, C. Ge, X. Zhang and Y. Jin, *Sensor. Actuat. B-Chem.*, 2020,  
120 311, 127919.
- 121 3. Y. Zhao, L. Tian, S. Wu, X. Zhang, Z. Sun, Y. Hu, Y. Wang, R. Chen and J. Lu, *Microchem. J.*,  
122 2021, 168, 106487.
- 123 4. Q. Gao, W. Liu and X. Zhu, *J. Liq. Chromatogr. R. T.*, 2020, 43, 809-818.
- 124 5. M. Pirsaeheb, N. Fattahi, M. Karami and H. R. Ghaffari, *J. Food Meas. Charact.*, 2017, 12, 118-  
125 127.
- 126 6. T. B. Pham, T. H. C. Hoang, V. H. Pham, V. C. Nguyen, T. V. Nguyen, D. C. Vu, V. H. pham  
127 and H. Bui, *Sci Rep.*, 2019, 9, 12590.
